# Supplementary material for: Machine-Learning-Based Late Fusion on Multi-Omics and Multi-Scale Data for Non-Small-Cell Lung Cancer Diagnosis
Source: MDPI journal article supplement (doi:10.3390/jpm12040601), 2022-04-08
Supplement: s1 [file s1]

## Supplementary Material

Francisco Carrillo-Perez, Juan Carlos Morales, Daniel Castillo-Secilla,  
Olivier Gevaert, Ignacio Rojas and Luis Javier Herrera

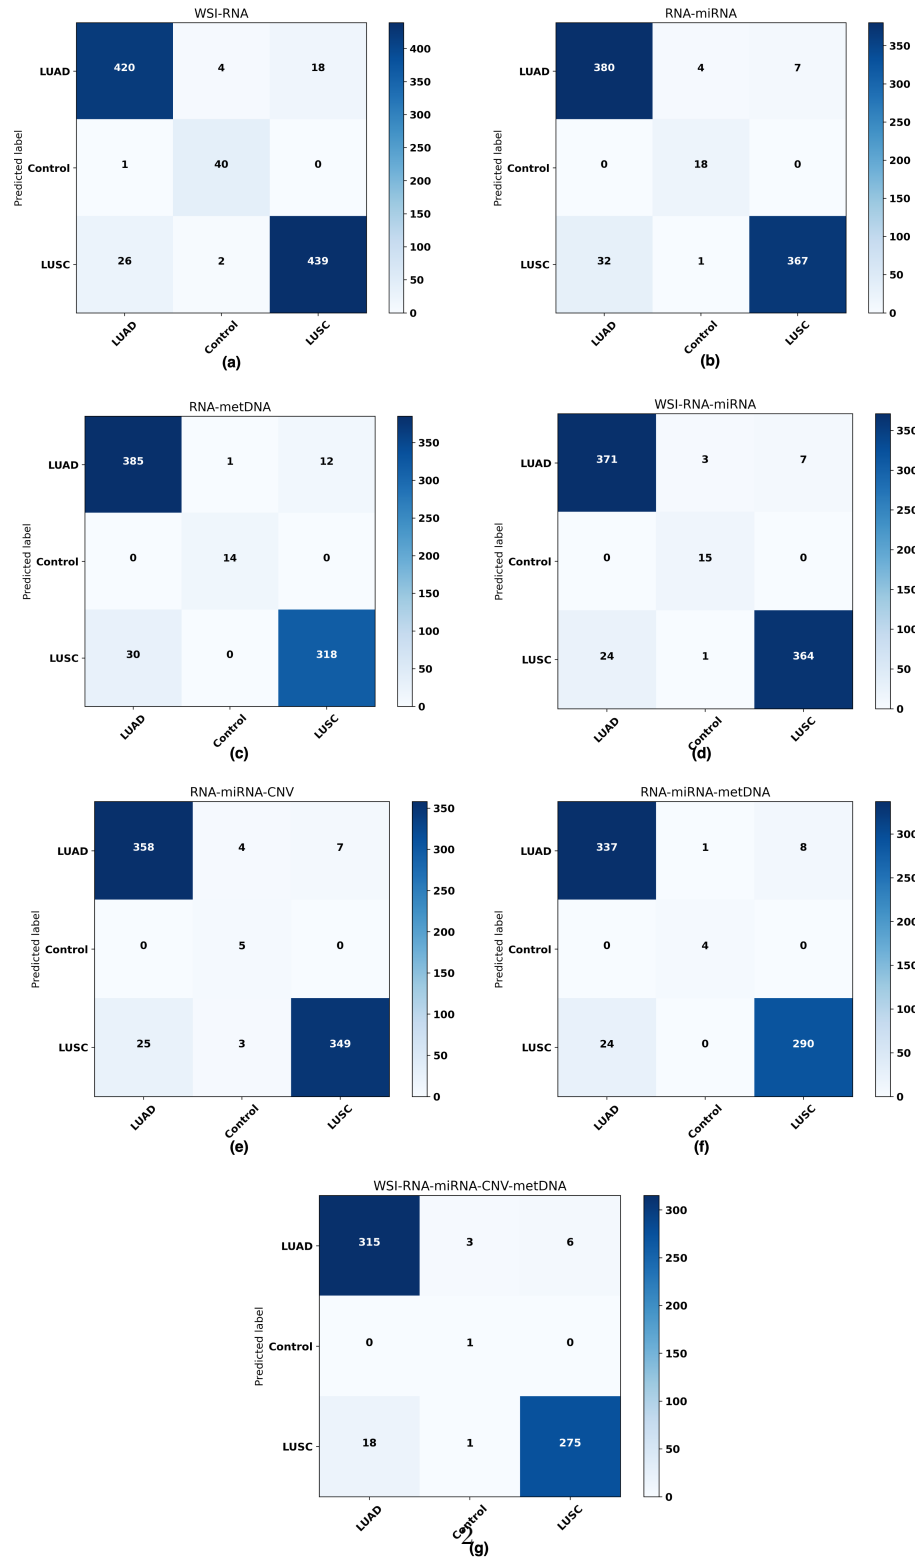

Figure S1: Confusion matrices obtained for different fusion models in the samples that the modalities have in common. WSI stands for Whole-Slide-Imaging, CNV stands for Copy Number Variation, and DNA for DNA Methylation.

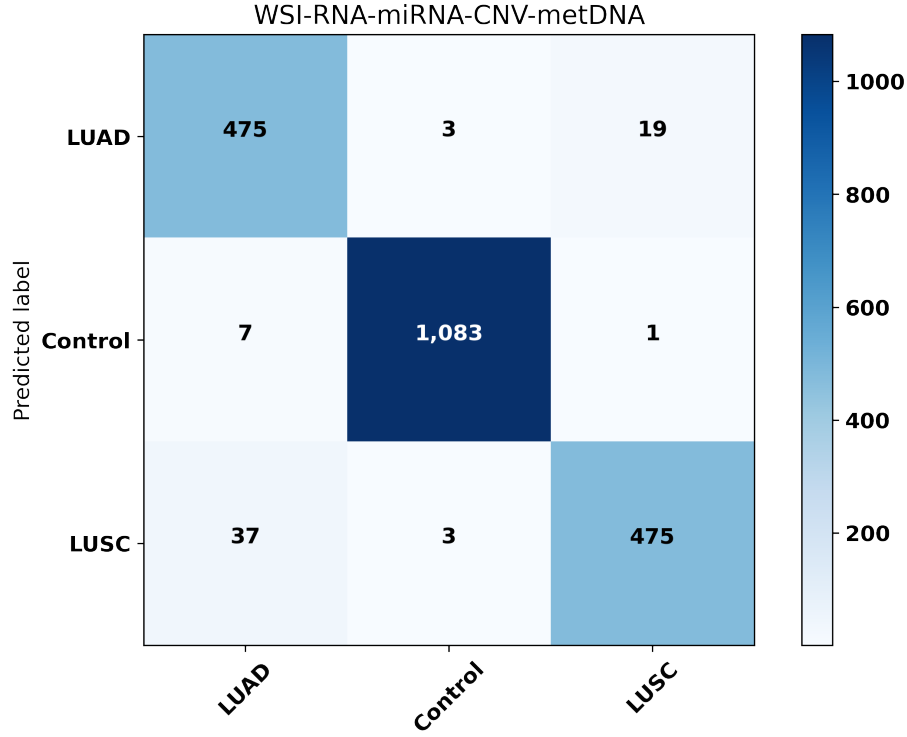

Figure S2: Confusion matrix for the fusion model using all modalities on all the available samples, without restricting to those that the modalities have in common (see Table 2 in main text). WSI stands for Whole-Slide-Imaging, CNV stands for Copy Number Variation, and metDNA for DNA Methylation.

Table S1: Number of samples in common per class when we integrate two sources of information. WSI stands for Whole-Slide-Imaging, CNV stands for Copy Number Variation, and metDNA for DNA Methylation.

| <b>Fusion</b> | LUAD | Control | LUSC |
|---------------|------|---------|------|
| WSI-RNA       | 442  | 41      | 467  |
| WSI-miRNA     | 402  | 68      | 405  |
| WSI-CNV       | 451  | 251     | 457  |
| WSI-metDNA    | 415  | 71      | 356  |
| RNA-miRNA     | 391  | 18      | 400  |
| RNA-CNV       | 433  | 23      | 448  |
| RNA-metDNA    | 398  | 14      | 348  |
| miRNA-CNV     | 385  | 20      | 397  |
| miRNA-metDNA  | 367  | 9       | 334  |
| CNV-metDNA    | 441  | 52      | 361  |

Table S2: Number of samples in common per class when we integrate three sources of information. WSI stands for Whole-Slide-Imaging, CNV stands for Copy Number Variation, and metDNA for DNA Methylation.

| <b>Fusion</b>    | LUAD | Control | LUSC |
|------------------|------|---------|------|
| WSI-RNA-miRNA    | 381  | 15      | 389  |
| WSI-RNA-CNV      | 419  | 23      | 437  |
| WSI-RNA-metDNA   | 383  | 14      | 336  |
| WSI-miRNA-CNV    | 376  | 20      | 383  |
| WSI-miRNA-metDNA | 356  | 9       | 319  |
| WSI-CNV-metDNA   | 397  | 52      | 346  |
| RNA-miRNA-CNV    | 369  | 5       | 377  |
| RNA-miRNA-metDNA | 346  | 4       | 314  |
| RNA-CNV-metDNA   | 383  | 10      | 337  |
| miRNA-CNV-metDNA | 349  | 2       | 324  |

Table S3: Number of samples in common per class when we integrate four and five sources of information. WSI stands for Whole-Slide-Imaging, CNV stands for Copy Number Variation, and metDNA for DNA Methylation.

| <b>Fusion</b>            | LUAD | Control | LUSC |
|--------------------------|------|---------|------|
| WSI-RNA-miRNA-CNV        | 360  | 5       | 367  |
| WSI-RNA-miRNA-metDNA     | 336  | 4       | 303  |
| WSI-RNA-CNV-metDNA       | 369  | 10      | 326  |
| RNA-miRNA-CNV-metDNA     | 333  | 1       | 304  |
| WSI-RNA-miRNA-CNV-metDNA | 324  | 1       | 294  |

Table S4: Ranges for the weights obtained for the five sources fusion and class in the 10 Fold-CV. The range presents the minimum and maximum values obtained with the optimization across the splits. WSI stands for Whole-Slide-Imaging, CNV stands for Copy Number Variation, and metDNA for DNA Methylation.

| <b>Fusion</b>            |        | LUAD         | Control      | LUSC         |
|--------------------------|--------|--------------|--------------|--------------|
| WSI-RNA-miRNA-CNV-metDNA | WSI    | [0.20, 0.33] | [0.21, 0.30] | [0.20, 0.28] |
|                          | RNA    | [0.17, 0.30] | [0.11, 0.16] | [0.17, 0.22] |
|                          | miRNA  | [0.15, 0.20] | [0.14, 0.20] | [0.17, 0.21] |
|                          | CNV    | [0.16, 0.21] | [0.27, 0.34] | [0.17, 0.24] |
|                          | metDNA | [0.16, 0.21] | [0.11, 0.17] | [0.14, 0.22] |
